# Supplementary material
Source: PubMed Central journal article supplement (PMC1963502)
Supplement: pcbi.0030156.sg002.pdf [file pcbi.0030156.sg002.pdf]

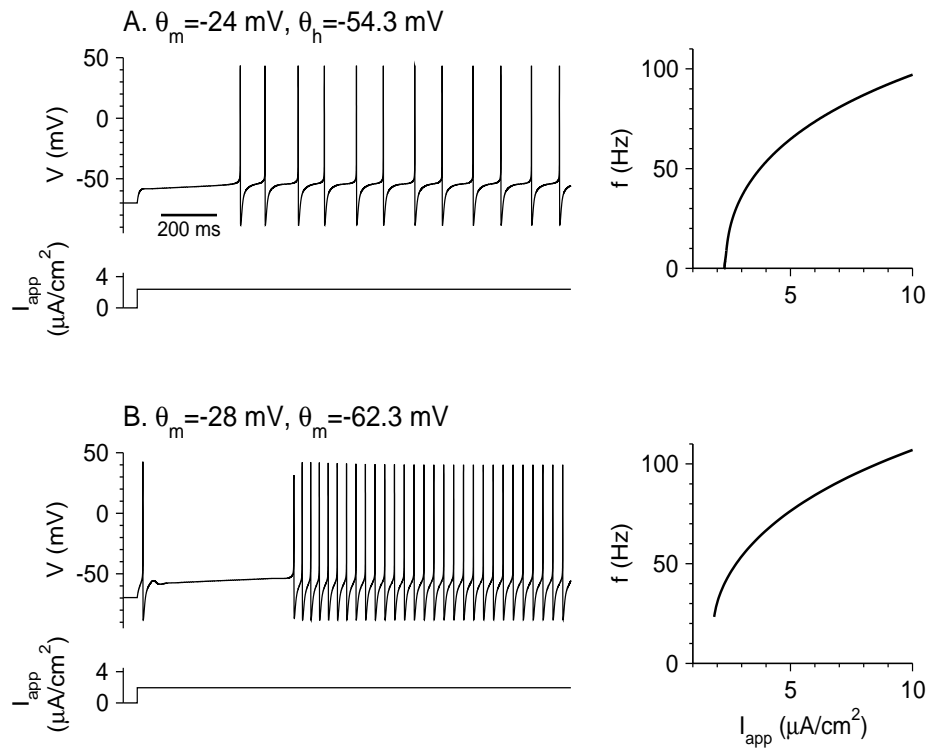

**Figure S2.** Response of the model neuron to noiseless current steps for modified  $\theta_h$  values.

A. Parameters:  $\theta_m = -24$  mV,  $\theta_h = -54.3$  mV,  $g_d = 0.39$  mS/cm<sup>2</sup>. Left: voltage trace for  $I_{app} = 2.38$   $\mu$ A/cm<sup>2</sup>. Right: the steady-state  $f$ - $I_{app}$  curve of the neuron. The average firing frequency goes to zero at firing threshold. B. Parameters:  $\theta_m = -28$  mV,  $\theta_h = -62.3$  mV,  $g_d = 0.39$  mS/cm<sup>2</sup>. Left: voltage trace for  $I_{app} = 1.95$   $\mu$ A/cm<sup>2</sup>. Right: the steady-state  $f$ - $I_{app}$  curve is discontinuous at the current threshold. The minimal frequency is 23.3 Hz.
